# Supplementary material
Source: PubMed Central journal article supplement (PMC6328316)

## Supplementary Information

### Thermal stress induces glycolytic beige fat formation via a myogenic state

Yong Chen, Kenji Ikeda, Takeshi Yoneshiro, Annarita Scaramozza, Kazuki Tajima, Qiang Wang, Kyeongkyu Kim, Kosaku Shinoda, Carlos Henrique Sponton, Zachary Brown, Andrew Brack, and Shingo Kajimura

#### 1. Supplementary Table 1

Primer sequences used for quantitative RT-PCR in this study.

#### 2. Uncropped images of WBs

Western blot films used in Extended Fig.7c and 7f

#### 3. SI Video

SVF cells isolated from the inguinal WAT of *Myod*-Cre<sup>ERT2</sup> reporter mice following  $\beta$ -blocker treatment. *Myod*-derived cells formed GFP<sup>+</sup> (green) myotubes and actively twitched even under pro-adipogenic conditions. Scale bar=100 $\mu$ m. (1 min 4 seconds)

**Supplementary Table.1 Primer sequences used for quantitative RT-PCR**

| <b>Gene</b>         | <b>Forward</b>              | <b>Reverse</b>              |
|---------------------|-----------------------------|-----------------------------|
| <i>Ucp1</i>         | CACCTTCCCCTGGACT            | CCCTAGGACACCTTTATACCTAATGG  |
| <i>Pgc1a</i>        | AGCCGTGACCACTGACAACGAG      | GCTGCATGGTTCTGAGTGCTAAG     |
| <i>Cox8b</i>        | GAACCATGAAGCCAACGACT        | GCGAAGTTCACAGTGTTCC         |
| <i>Elovl3</i>       | TCC GCG TTC TCA TGT AGG TCT | GGA CCT GAT GCA ACC CTA TGA |
| <i>Cidea</i>        | ATCACAACTGGCCTGGTTACG       | TACTACCCGGTGTCCATTCT        |
| <i>Adrb1</i>        | CCGAAAGCAGGTGAATGCAA        | AGCCAGTAAGCCATACTAAGCCACA   |
| <i>Adrb2</i>        | CATTGATGTGTTGTGCGTCA        | ACTCGGGCCTTATTCTTGGT        |
| <i>Adrb3</i>        | CCTTCCGTGCTTCTGTGT          | AGCCATCAAACCTGTTGAGC        |
| <i>Adora2a</i>      | GCCATCCATTGCCATCA           | GCAATAGCCAAGAGGCTGAAGA      |
| <i>Myh1</i>         | GCGAATCGAGGCTCAGAACAA       | GTAGTTCCGCCTTCGGTCTTG       |
| <i>Myl1</i>         | AGTGCTGACCAGATTGCCG         | TCATGGGCAGAACTGTTCAA        |
| <i>Mylpf</i>        | TTCAAGGAGGCGTTCCTGTA        | TAGCGTCGAGTTCCTCATTCT       |
| <i>Mybpc1</i>       | AAGAATGGTCTCTTGGTGAGTCA     | CACCGATCCGGTTTGAGGT         |
| <i>Acta1</i>        | CCCAAAGCTAACCGGGAGAAG       | CCAGAATCCAACACGATGCC        |
| <i>MyoD</i>         | CCACTCCGGGACATAGACTTG       | AAAAGCGCAGGTCTGGTGAG        |
| <i>Prdm16</i>       | CAGCACGGTGAAGCCATTC         | GCGTGCATCCGCTTGTG           |
| <i>Pdha1</i>        | GAAATGTGACCTTCATCGGCT       | TGATCCGCCTTTAGCTCCATC       |
| <i>Pdhb</i>         | CGGTGCAGTTGACAGTTCGT        | TCTTCCCCAAGCAGAAAACTTT      |
| <i>Pkm2</i>         | GCCGCCTGGACATTGACTC         | CCATGAGAGAAATTCAGCCGAG      |
| <i>Hk2</i>          | TGATCGCCTGCTTATTCACGG       | AACCGCCTAGAAATCTCCAGA       |
| <i>Gapdh</i>        | TGGATTTGGACGCATTGGTC        | TTTGCCTGGTACGTGTTGAT        |
| <i>Ldha</i>         | TGTCTCCAGCAAAGACTACTGT      | GACTGTACTTGACAATGTTGGGA     |
| <i>Ldhb</i>         | CATTGCGTCCGTTGCAGATG        | GGAGGAACAAGCTCCCGTG         |
| <i>Pfkip</i>        | CGCCTATCCGAAGTACCTGGA       | CCCCGTGTAGATTCCCATGC        |
| <i>Eno1</i>         | TGCGTCCACTGGCATCTAC         | CAGAGCAGGCGCAATAGTTTTA      |
| <i>Erra</i>         | CTCAGCTCTTACCCAAACGC        | CCGCTTGGTGATCTCACACTC       |
| <i>Errb</i>         | GGACTCGCCGCTATGTTT          | CGTTAAGCATGACTCGCATTG       |
| <i>Errg</i>         | AAGATCGACACATTGATTCCAGC     | CATGGTTGAACTGTAECTCCAC      |
| <i>Gabpa</i>        | AGCGCATCTCGTTGAAGAAG        | TCTGCTCTTTTCTGTAGCCT        |
| <i>Pdgfra</i>       | TCCATGCTAGACTCAGAAGTCA      | TCCGGTGGACACAATTTTTT        |
| <i>Pax7</i>         | GTGGAATCAGAACCCGACCTC       | GTAGTGGTCTCTCAAAGGC         |
| <i>Ebf2</i>         | TATGTCAGGCTCATCGACTCTG      | CATCACCTCGTGTGTCAGCA        |
| <i>Bmpr1a</i>       | AACAGCGATGAATGTCTTCGAG      | GTCTGGAGGCTGGATTATGGG       |
| <i>Bmpr1b</i>       | CCCTCGGCCAAGATCCTA          | CAACAGGCATTCCAGAGTCATC      |
| <i>Bmpr2</i>        | TTGGGATAGGTGAGAGTCGAAT      | TGTTTACAAGATTGATGTCCCC      |
| <i>Smad5</i>        | TTGTTCAGAGTAGGAAGTCAAC      | GAAGCTGAGCAAACCTCTGAT       |
| <i>CD34</i>         | GGTAGCTCTTGCCTGATGAG        | TGGTAGGAAGTATGGGGATATT      |
| <i>Zic1</i>         | CAGTATCCCGCGATTGGTGT        | GCGAACTGGGGTTGAGCTT         |
| <i>Itgb1(CD29)</i>  | ACTGTGATGCCGTATATTAGCAC     | GATATGCGTTGCTGACCAACA       |
| <i>Ncam1 (CD56)</i> | ACCACCGTCACTACTAATCT        | TGGGGCAATACTGGAGGTCA        |
| <i>Vcam</i>         | AGTTGGGGATTTCGGTTGTTCT      | CCCCTCATTCTTACCACCC         |
| <i>Tbp</i>          | ACCCTTCAACCAATGACTCCTATG    | TGACTGCAGCAAATCGCTTGG       |
| <i>18s</i>          | AGTCCCTGCCCTTTGTACACA       | CGATCCGAGGGCCTCACT          |
| <i>36B4</i>         | TCCAGGCTTTGGGCATCA          | CTTTATCAGCTGCACATCACTCAGA   |

## Uncropped images of WBs

**a** Western blot films in Extend. Figure 7c

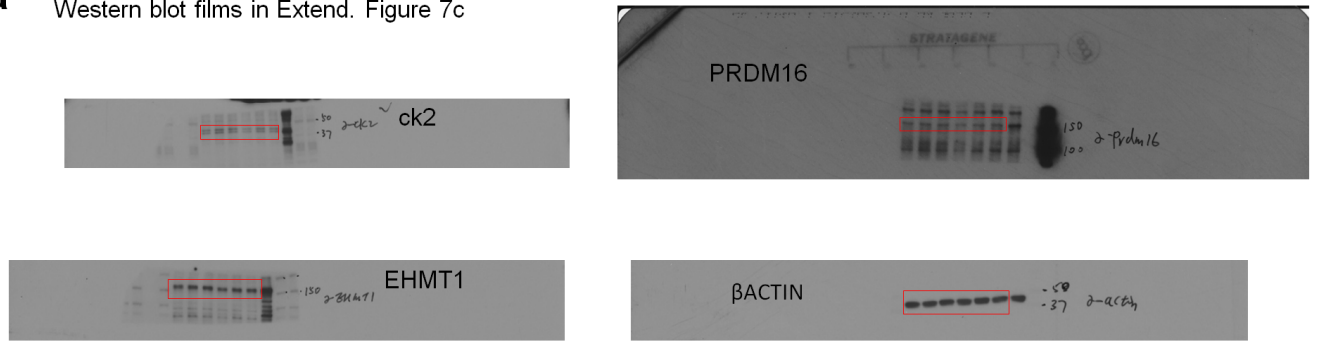

**b** Western blot films in Extend. Figure 7f

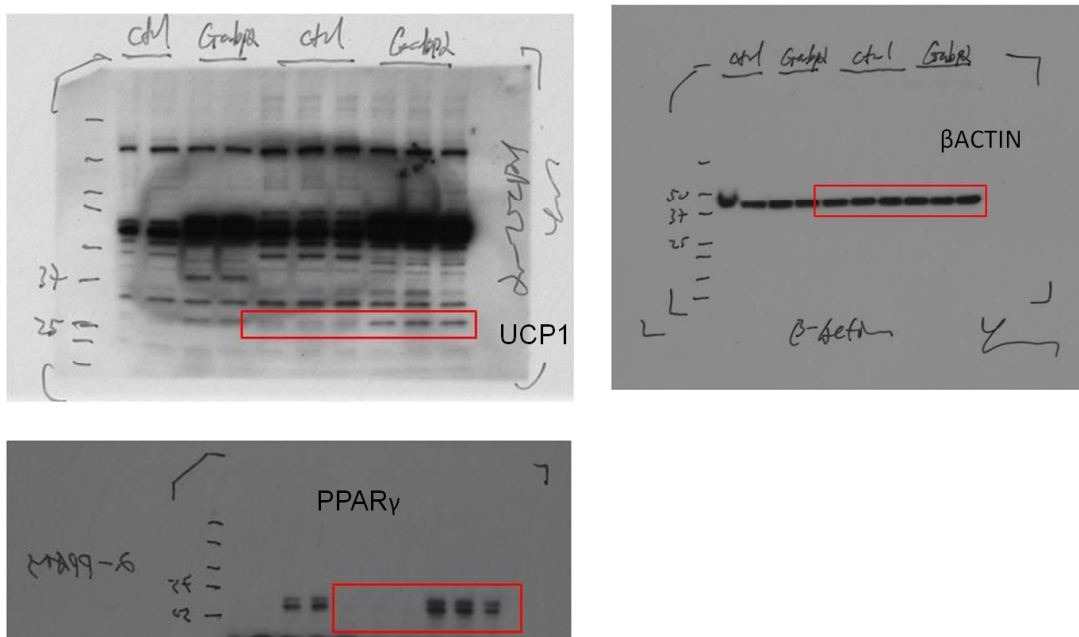

Supplement: NIHMS1511851-supplement-Supplementary_Information.pdf [file NIHMS1511851-supplement-Supplementary_Information.pdf]
